# Supplementary material for: Biomimetic iron(iii) complexes of N3O and N3O2 donor ligands: protonation of coordinated ethanolate donor enhances dioxygenase activity
Source: Royal Society of Chemistry journal article supplement (doi:10.1039/c1dt10495k), 2011-01-01
Supplement: c1dt10495k.pdf [file c1dt10495k.pdf]

## Supporting Information

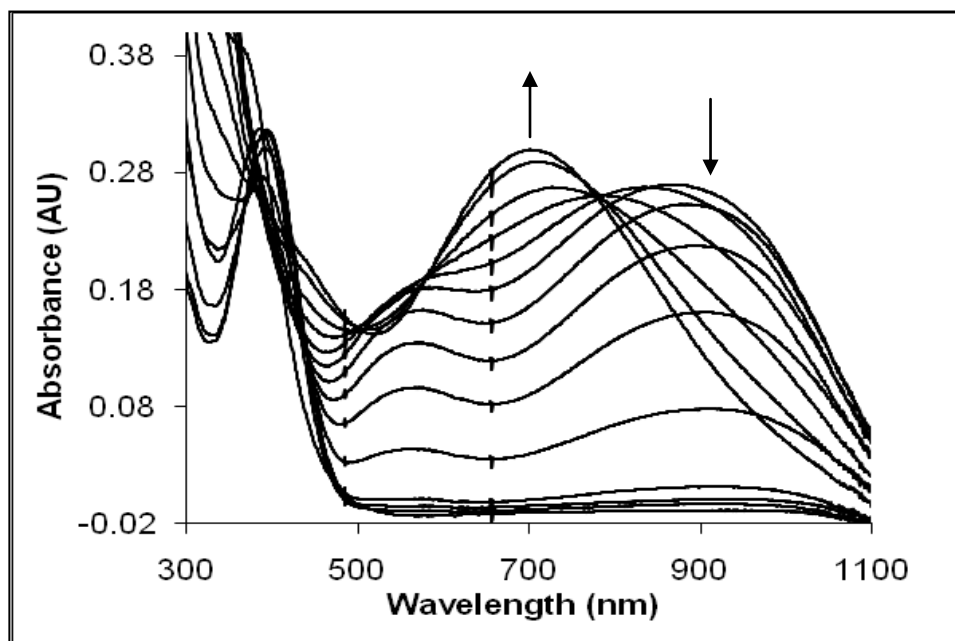

**Figure S1.** Spectrophotometric titration of a solution of equimolar amounts of  $[\text{Fe}(\text{L}1)\text{Cl}_2]$  **1** ( $2 \times 10^{-4}$  M) and 3,5-di-*tert*-butylcatechol ( $\text{H}_2\text{DBC}$ ) against triethylamine in methanol.

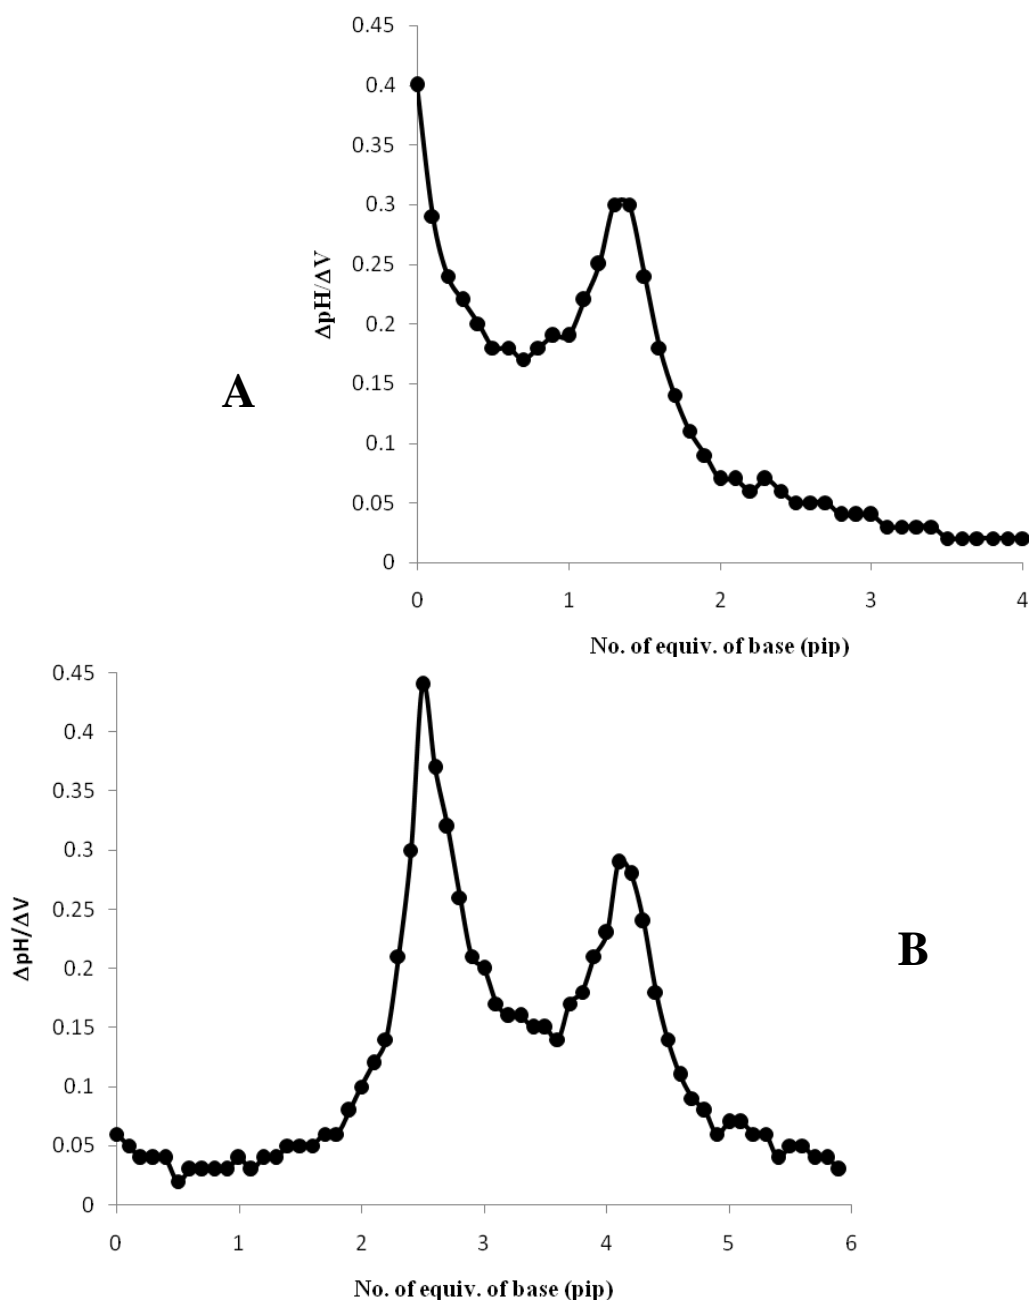

**Figure S2.** A. pH titration of an equimolar mixture of complex **1** ( $4 \times 10^{-4}$  M), and  $H_2DBC$  against piperidine in methanol solution. B. pH titration of an equimolar mixture of complex **1** ( $4 \times 10^{-4}$  M),  $HClO_4$  and  $H_2DBC$  against piperidine in methanol solution.
